# Supplementary material for: An ultrastable perovskite–polymer exciplex through self energy-level adaption for under-water light-emitting devices
Source: Royal Society of Chemistry journal article supplement (doi:10.1039/d2tc01006b), 2022-01-01
Supplement: d2tc01006b1.pdf [file d2tc01006b1.pdf]

## Supporting Information

# Ultrastable Perovskite–Polymer Exciplex through Self Energy-level Adaption for Under- water Light-emitting Devices

*Yiwei Zhang, Baohuan Zhang, Yulan Fu, Yu Han, Tinglin Zhang,  
Lisha Zhang, Jinxin Guo\* and Xinping Zhang\**

*Institute of Information Photonics Technology, Faculty of Science, Beijing  
University of Technology, Beijing 100124, P. R. China*

*\*Email: [jinxin.guo@bjut.edu.cn](mailto:jinxin.guo@bjut.edu.cn), [zhangxinping@bjut.edu.cn](mailto:zhangxinping@bjut.edu.cn)*

## **Experimental methods**

### ***Fabrication of perovskite- emitting polymer blend in A-DCP matrix***

The precursor of MAPbBr<sub>3</sub> was prepared by dissolving 0.6 mmol MABr and 0.6 mmol PbBr<sub>2</sub> into 1 ml N,N-Dimethylformamide (DMF) and the resultant solution was stirred at room temperature for overnight. The poly(9,9-dioctylfluorene-alt-benzothiadiazole) (F8BT) was dissolved in chloroform (CF) at a concentration of 20 mg/ml, the solution was stirred at room temperature for overnight. MABr and PbBr<sub>2</sub> was purchased from Xi'an Polymer Light limited. F8BT was purchased from 1-Materials Inc. and all the solvent was purchased from Sigma- Aldrich.

50 µl precursor of MAPbBr<sub>3</sub> dissolved in DMF is dropped into 500-µl acrylate monomer, 2-propenoic acid [octahydro-4,7-methano-1H-indene-2,5-diyl]bis(methylene) ester (A-DCP) with benzoin dimethyl ether (DMPA) of 0.5 wt.% with respect to the monomer for UV-light sensitization followed by vigorous stirring at room temperature; during the stirring, precipitate of MAPbBr<sub>3</sub> appear. After the formation of the MAPbBr<sub>3</sub> micro cubes, a CF solution of F8BT is directly injected into the suspension of MAPbBr<sub>3</sub> precipitate under continuous stirring. Finally, the resultant liquid is heated at 80 °C for 20 minutes to remove any unwanted solvent. All the process is carried out in a nitrogen-filled glovebox to avoid the influence of oxygen and moisture.

### ***PL and absorption characterization***

The steady state PL spectra was collected by an Edinburgh Instrument FLS920 Spectrometer with a Xenon lamp as excitation light source.

Time-resolved fluorescence was measured by a time-correlated single photon counting (TCSPC) module in the FLS920 Spectrometer. A 405 nm laser with the tuneable repetition rate was used as the excitation beam and a 455 nm high-pass filter was placed in front of the signal detector to block any scattered excitation light.

The steady absorption measurements were conducted using a Xe lamp and a USB4000 spectrometer (Ocean Optics).

For all the above-mentioned PL and absorption measurements, a homemade sample cabinet connected with a liquid helium compressor and a Cryogenic Temperature Controller (Lakeshore Ltd.) was used to control the sample temperature.

### ***TA measurements***

The TA measurements were carried out using a femtosecond pump-probe system, where a femtosecond laser (Legend Elite Series, Coherent Inc.) at 800 nm with a repetition rate of 1 kHz and pulse width of 150 fs was used as pump light after frequency-doubling by a  $\beta$ -barium borate crystal producing 400 nm pulses. A supercontinuum was generated by focusing a small portion of 800 nm femtosecond laser pulse to heavy water in a cuvette and used as the probe.

#### ***LED fabrication and characterization***

To fabricate the UV-LED driven light emitting devices, the UV-LED chip was dipped into the blend indicated in Figure 1 and lifted out after 5 seconds then turn on the UV-LED to realize polymerization.

The process was repeated three to ensure a sufficient thickness of the material at the surface of the UV-LED.

The UV-LED were driven by a Keithley 2400 at 3 V and various currents, the EL spectra were recorded using a USB4000 spectrometer (Ocean Optics).

The LED performance were characterized in ambient environment using a Keithley 2400 source meter and a Keithley 2000 multimeter connected to a calibrated Si photodiode (PDA100A2, Thorlabs). The luminous efficiency was calculated by assuming a Lambertian emission distribution from the devices.

#### ***UPS measurement***

UPS experiments were performed using a Thermo Scientific Escalab 250Xi UPS/XPS Photoelectron Spectrometer with He I (21.22) eV photon lines. Binding energies were calibrated by measuring the Fermi step position and the Au 4f<sub>7/2</sub> core level of a clean gold film.

#### ***SEM and XRD characterization***

Morphology experiments were performed using a JEOL JSM 6510 emission scanning electron microscopy (SEM). The XRD examinations were carried out using a D8 Advance instrument.

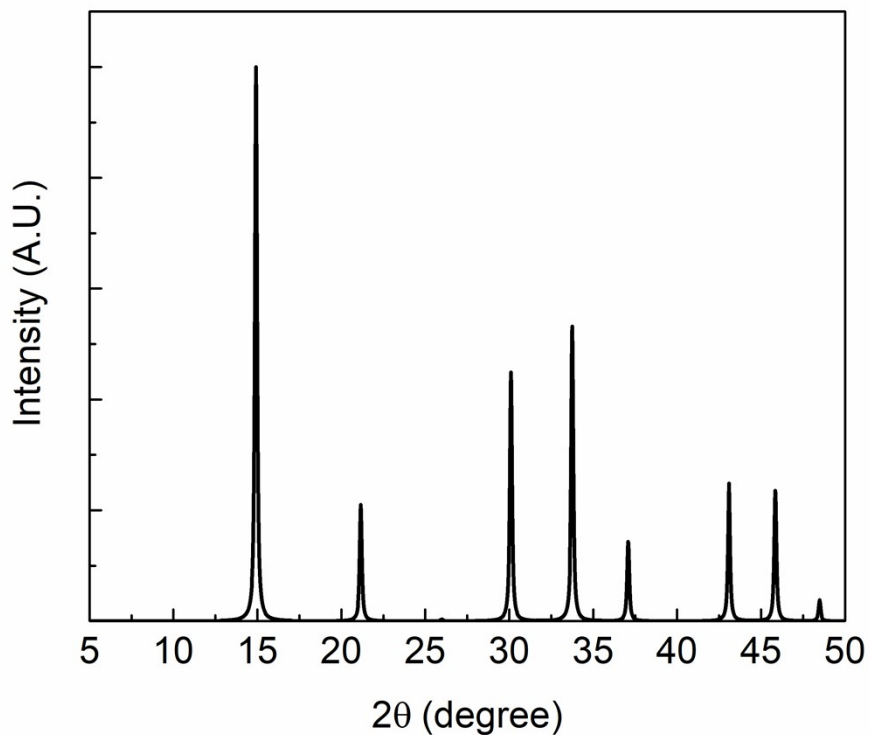

Figure S1. XRD pattern of MAPbBr<sub>3</sub> single crystal.

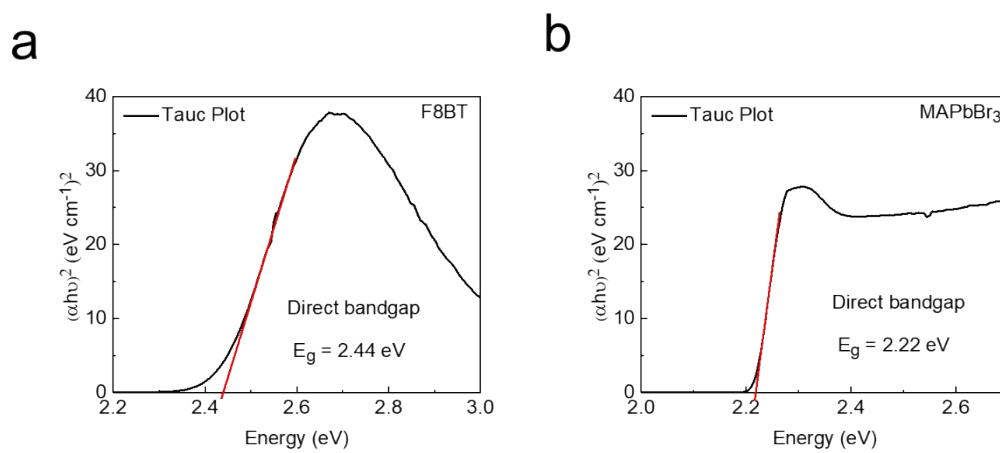

Figure S2. Tauc analysis of F8BT and MAPbBr<sub>3</sub> to determine the energy band gap. For both materials, a direct band gap is determined and the bandgap are 2.44 (F8BT) and 2.22 (MAPbBr<sub>3</sub>) eV respectively.

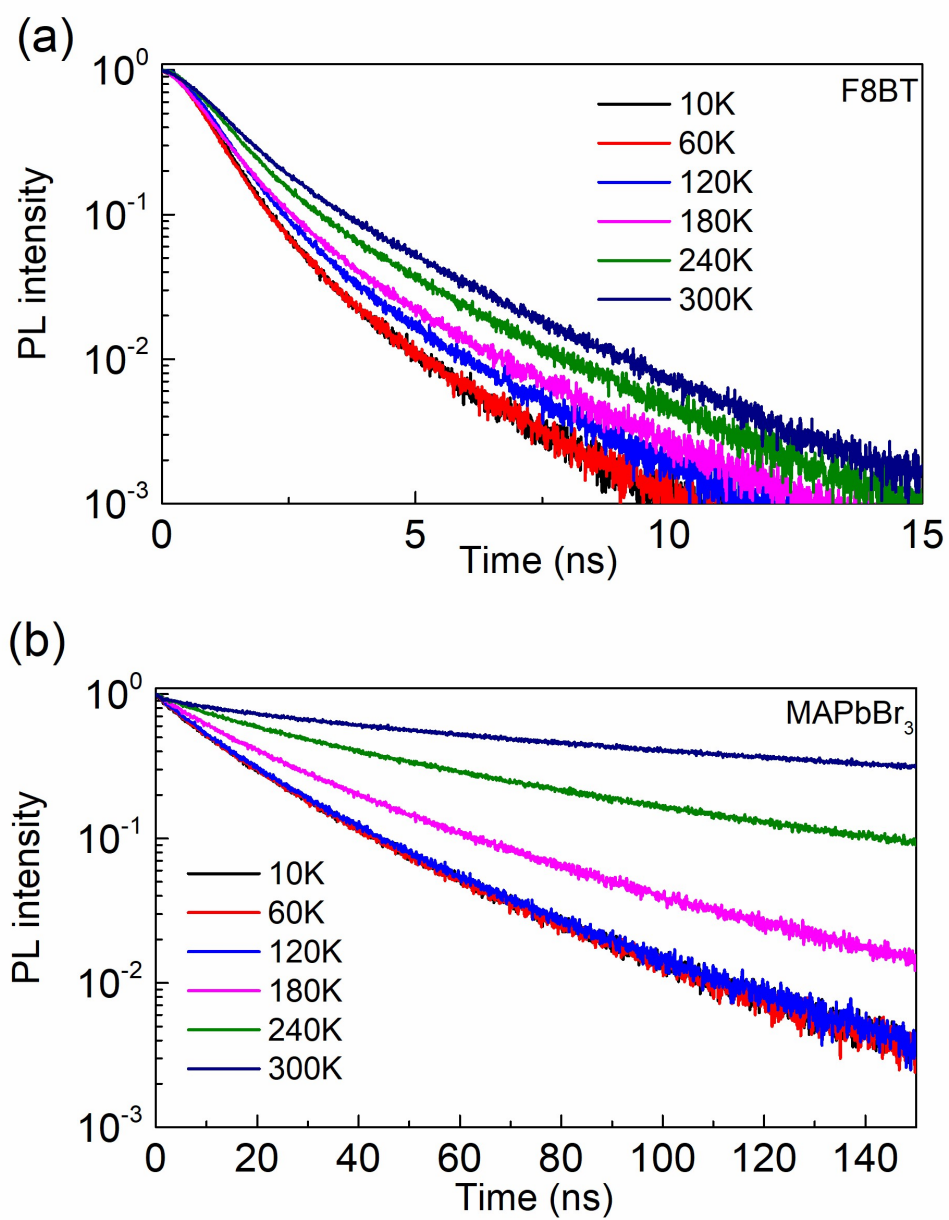

Figure S3. PL decay of (a) F8BT and (b) MAPbBr<sub>3</sub> in the photopolymer matrix at different temperatures.

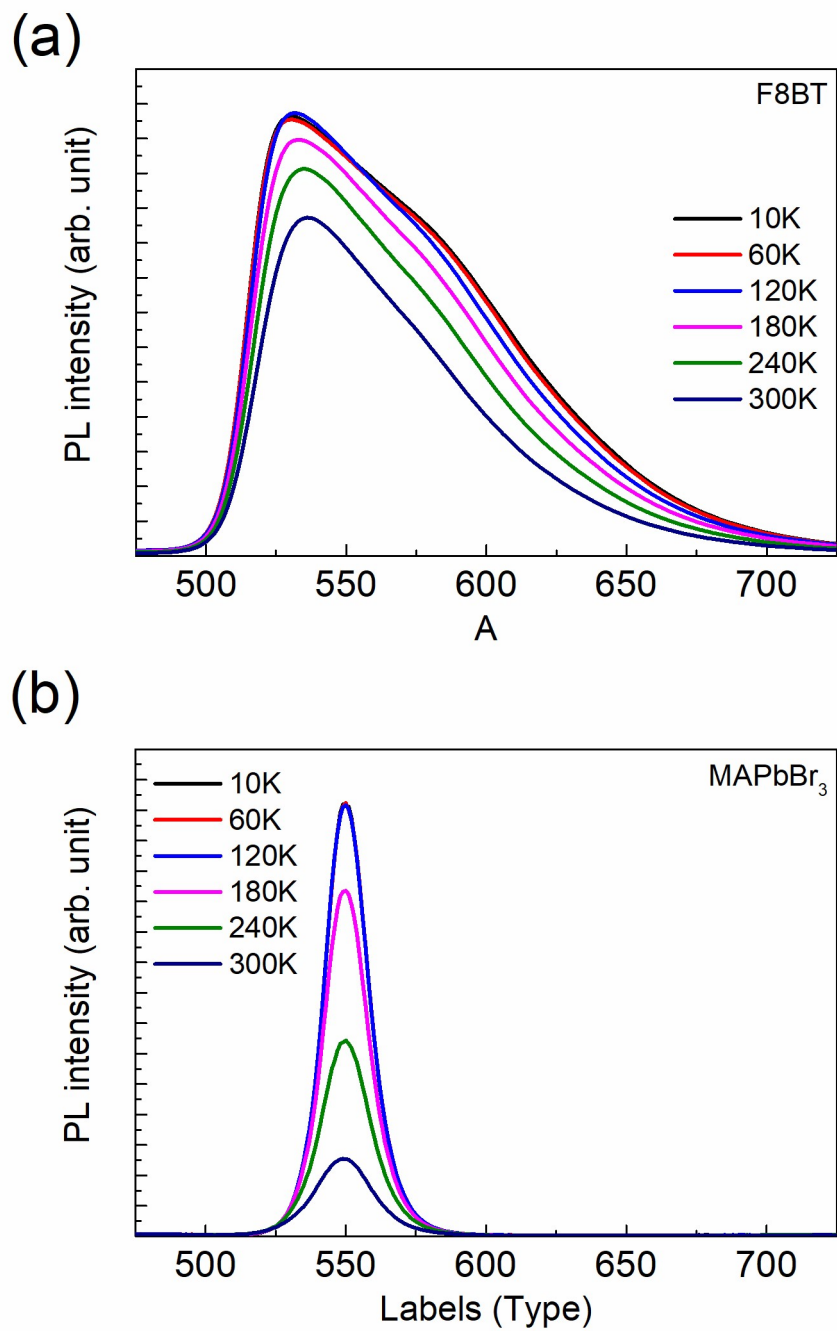

Figure S4. PL spectra of (a) F8BT and (b) MAPbBr<sub>3</sub> in the photopolymer matrix at different temperatures.

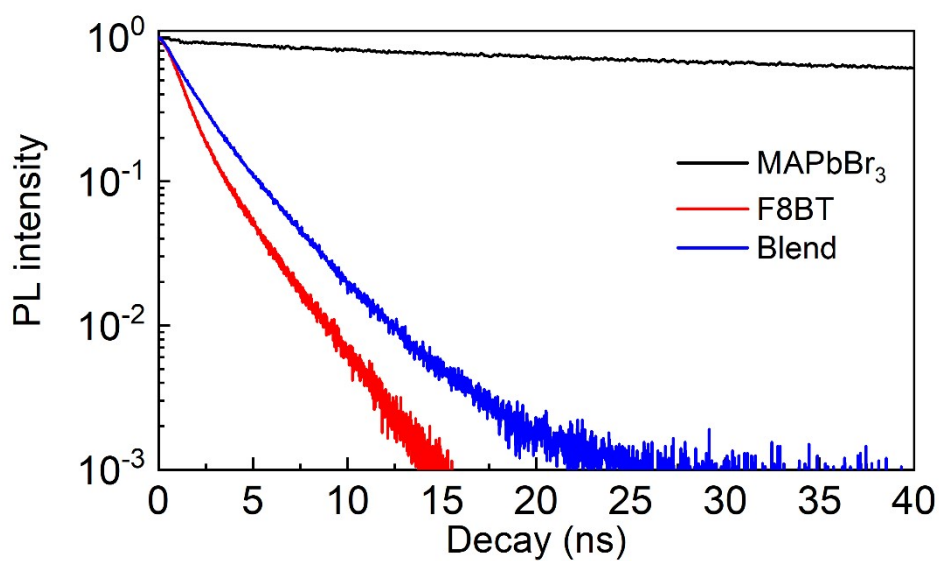

Figure S5. PL decay of F8BT- MAPbBr<sub>3</sub> blend in the photopolymer matrix measured at 550 nm.

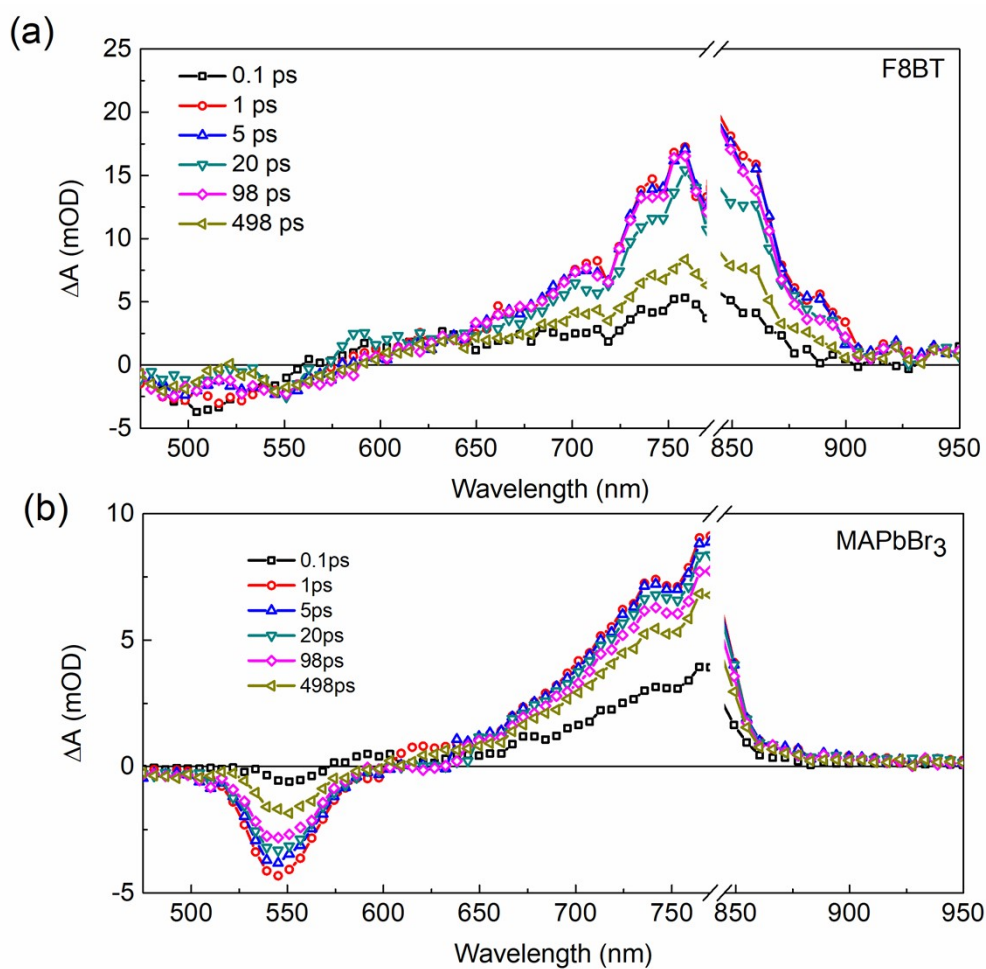

Figure S6. The transient absorption spectra of (a) F8BT and (b) MAPbBr<sub>3</sub> in the photopolymer matrix.

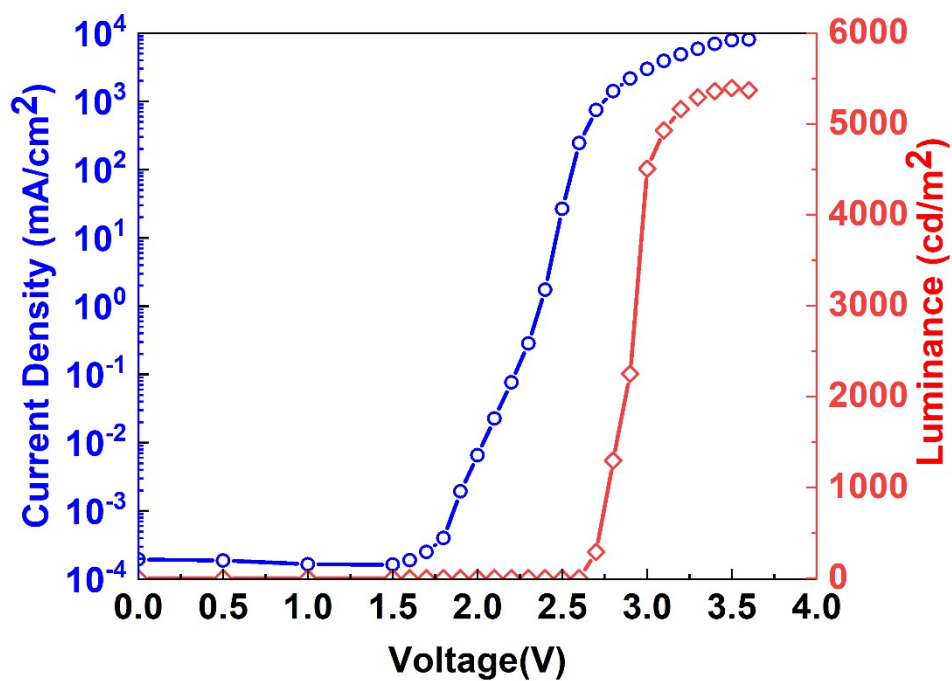

Figure S7. Current density – luminance – voltage (J – L - V) characteristics of the UV-LED driven light emitting devices.

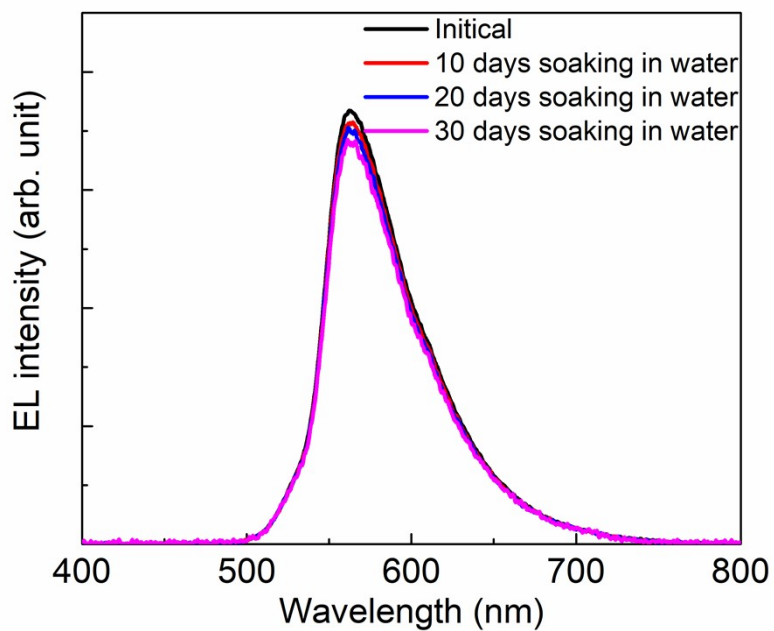

Figure S8. The EL spectra of the LED devices before and after soaking in water for different times.



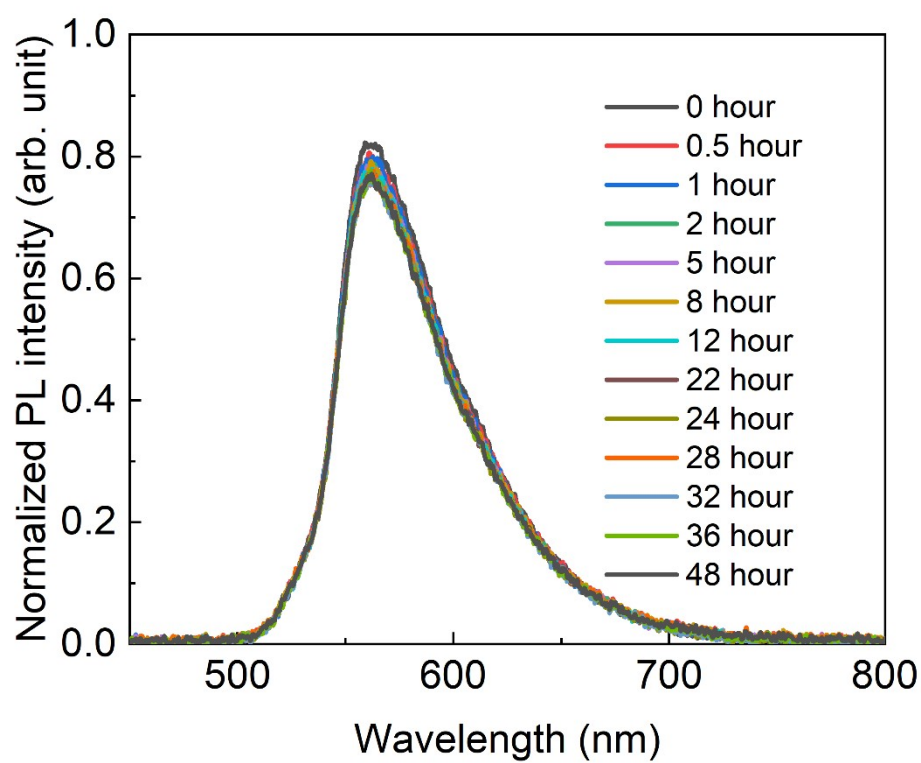

Figure S9. Emission spectra of the light emitting devices tested under continuous working conditions at 3 V, 0.3 mA for different times.
